# Supplementary material for: MicroRNA-423-5p Mediates Cocaine-Induced Smooth Muscle Cell Contraction by Targeting Cacna2d2
Source: MDPI journal article supplement (doi:10.3390/ijms24076584), 2023-04-01
Supplement: s1 [file s1]

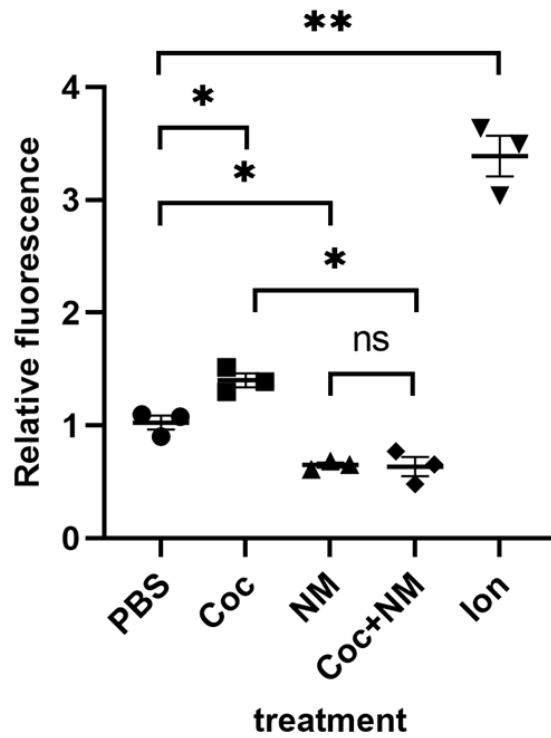

**Figure S1.** SMCs were treated with cocaine, NM, either individually or combined, FACS quantification of free  $\text{Ca}^{2+}$ -specific fluorescence emission shows that NM blocks the calcium channel and decreased intracellular calcium  $[\text{Ca}^{2+}]_i$  compared with PBS. NM also abrogates the increasing effect caused by cocaine. Ionomycin treated cells were used as positive control. (ns: not significant; \* $p < 0.05$ , \*\* $p < 0.01$ ).
